# Supplementary material for: The influence of calcitonin gene-related peptide on markers of bone metabolism in MG-63 osteoblast-like cells co-cultured with THP-1 macrophage-like cells under virtually osteolytic conditions
Source: BMC Musculoskelet Disord. 2016 May 4;17:199. doi: 10.1186/s12891-016-1044-5 (PMC4855322; doi:10.1186/s12891-016-1044-5)
Supplement: Additional file 1: — Data and statistical analysis of particle- or LPS-activated THP-1/MG-63 co-cultures. (XLSX 20 kb) [file 12891_2016_1044_MOESM1_ESM.xlsx]

## Sheet: activated cells
S1: Data and statistical analysis of particle- or LPS-activated THP1 / MG-63 co-cultures
Employing descriptive statistics, mean ± standard deviation (SD) for the expression or secretion of selected biomarkers of inflammation and osteoblast activity during the activation of THP-1 macrophage-like cells, co-cultured with MG-63 osteoblast-like cells, using different osteolytic stimuli (groups: negative control, 10 pg/ml LPS, 100 ng/ml LPS, UHMWPE with a cell-to-particle ratio of 1:500) f…
analyte	culture	osteolytic stimulus	Mean ± SD			p-values of particle- or LPS-associated effects
			6h	24h	48h	negative control			LPS (10 pg/ml)			LPS (100 ng/ml)			UHMWPE (1:500)
						6h	24h	48h	6h	24h	48h	6h	24h	48h	6h	24h	48h
TNF-α secretion [pg/ml] per 100.000 cells	MG-63 control	negative control	b.d.	b.d.	b.d.	-	-	-	n.a.	n.a.	n.a.	n.a.	n.a.	n.a.	n.a.	n.a.	n.a.
		LPS (10 pg/ml)	b.d.	b.d.	b.d.	n.a.	n.a.	n.a.	-	-	-	n.a.	n.a.	n.a.	n.a.	n.a.	n.a.
		LPS (100 ng/ml)	b.d.	b.d.	b.d.	n.a.	n.a.	n.a.	n.a.	n.a.	n.a.	-	-	-	n.a.	n.a.	n.a.
		UHMWPE (1:500)	b.d.	b.d.	b.d.	n.a.	n.a.	n.a.	n.a.	n.a.	n.a.	n.a.	n.a.	n.a.	-	-	-
	THP-1 / MG-63	negative control	b.d.	b.d.	b.d.	-	-	-	n.a.	n.a.	n.a.	n.a.	n.a.	n.a.	n.a.	n.a.	n.a.
		LPS (10 pg/ml)	b.d.	b.d.	b.d.	n.a.	n.a.	n.a.	-	-	-	n.a.	n.a.	n.a.	n.a.	n.a.	n.a.
		LPS (100 ng/ml)	256.1 ± 59.60	141.8 ± 13.83	80.75 ± 8.458	n.a.	n.a.	n.a.	n.a.	n.a.	n.a.	-	-	-	<0.0001	<0.0001	<0.0001
		UHMWPE (1:500)	10.31 ± 3.379	3.963 ± 1.847	2.619 ± 0.195	n.a.	n.a.	n.a.	n.a.	n.a.	n.a.	<0.0001	<0.0001	<0.0001	-	-	-
OPG secretion [pg/ml] per 10 µg protein	MG-63 control	negative control	2611 ± 307.7	7122 ± 118.9	11086 ± 1537	-	-	-	0.0370	n.s.	n.s.	0.0295	0.0285	n.s.	0.0041	n.s.	n.s.
		LPS (10 pg/ml)	1558 ± 440.9	5270 ± 889.5	9353 ± 722.2	0.0370	n.s.	n.s.	-	-	-	n.s.	n.s.	n.s.	n.s.	n.s.	n.s.
		LPS (100 ng/ml)	1525 ± 250.5	4832 ± 655.1	8085 ± 789.5	0.0295	0.0285	n.s.	n.s.	n.s.	n.s.	-	-	-	n.s.	n.s.	n.s.
		UHMWPE (1:500)	1345 ± 322.3	5291 ± 899.3	8424 ± 1167	0.0041	n.s.	n.s.	n.s.	n.s.	n.s.	n.s.	n.s.	n.s.	-	-	-
	THP-1 / MG-63	negative control	1263 ± 266.5	7169 ± 1069	11551 ± 2064	-	-	-	n.s.	n.s.	n.s.	n.s.	n.s.	n.s.	n.s.	n.s.	n.s.
		LPS (10 pg/ml)	1373 ± 394.2	6433 ± 921.9	7980 ± 1263	n.s.	n.s.	n.s.	-	-	-	n.s.	n.s.	0.0007	n.s.	n.s.	0.0062
		LPS (100 ng/ml)	1410 ± 310.8	6947 ± 649.8	13699 ± 1788	n.s.	n.s.	n.s.	n.s.	n.s.	0.0007	-	-	-	n.s.	n.s.	n.s.
		UHMWPE (1:500)	1830 ± 532.2	6522 ± 1002	12665 ± 1252	n.s.	n.s.	n.s.	n.s.	n.s.	0.0062	n.s.	n.s.	n.s.	-	-	-
rel. OPG mRNA expression [%]	MG-63 control	negative control	1751 ± 235.3	1411 ± 94.31	-	-	-	-	n.s.	n.s.	-	n.s.	n.s.	-	n.s.	n.s.	-
		LPS (10 pg/ml)	1834 ± 189.1	1411 ± 57.39	-	n.s.	n.s.	-	-	-	-	n.s.	n.s.	-	n.s.	n.s.	-
		LPS (100 ng/ml)	1608 ± 229.4	1367 ± 161.3	-	n.s.	n.s.	-	n.s.	n.s.	-	-	-	-	n.s.	n.s.	-
		UHMWPE (1:500)	1833 ± 292.8	1196 ± 165.3	-	n.s.	n.s.	-	n.s.	n.s.	-	n.s.	n.s.	-	-	-	-
	THP-1 / MG-63	negative control	2455 ± 300.5	2365 ± 331.9	-	-	-	-	n.s.	n.s.	-	n.s.	0.0011	-	n.s.	n.s.	-
		LPS (10 pg/ml)	2031 ± 432.4	2321 ± 239.1	-	n.s.	n.s.	-	-	-	-	0.0264	0.0006	-	n.s.	n.s.	-
		LPS (100 ng/ml)	2755 ± 68.52	3089 ± 191.1	-	n.s.	0.0011	-	0.0264	0.0006	-	-	-	-	n.s.	n.s.	-
		UHMWPE (1:500)	2634 ± 191.8	2702 ± 174.3	-	n.s.	n.s.	-	n.s.	n.s.	-	n.s.	n.s.	-	-	-	-
OPN secretion [pg/ml] per 100.000 cells	MG-63 control	negative control	b.d.	b.d.	b.d.	-	-	-	n.a.	n.a.	n.a.	n.a.	n.a.	n.a.	n.a.	n.a.	n.a.
		LPS (10 pg/ml)	b.d.	b.d.	b.d.	n.a.	n.a.	n.a.	-	-	-	n.a.	n.a.	n.a.	n.a.	n.a.	n.a.
		LPS (100 ng/ml)	b.d.	b.d.	b.d.	n.a.	n.a.	n.a.	n.a.	n.a.	n.a.	-	-	-	n.a.	n.a.	n.a.
		UHMWPE (1:500)	b.d.	b.d.	b.d.	n.a.	n.a.	n.a.	n.a.	n.a.	n.a.	n.a.	n.a.	n.a.	-	-	-
	THP-1 / MG-63	negative control	80.84 ± 33.77	344.0 ± 73.00	420.6 ± 130.5	-	-	-	n.s.	n.s.	n.s.	n.s.	0.0368	n.s.	n.s.	n.s.	n.s.
		LPS (10 pg/ml)	102.8 ± 36.17	221.7 ± 99.79	403.2 ± 225.9	n.s.	n.s.	n.s.	-	-	-	n.s.	0.0003	n.s.	n.s.	n.s.	n.s.
		LPS (100 ng/ml)	104.0 ± 28.46	505.3 ± 172.3	375.0 ± 75.80	n.s.	0.0368	n.s.	n.s.	0.0003	n.s.	-	-	-	n.s.	0.0017	n.s.
		UHMWPE (1:500)	89.39 ± 43.66	274.3 ± 55.54	483.3 ± 143.0	n.s.	n.s.	n.s.	n.s.	n.s.	n.s.	n.s.	0.0017	n.s.	-	-	-
ALP activity [U/ml] per 10 µg protein	MG-63 control	negative control	-	0.0001467 ± 3.786E-005	9.000E-005 ± 2.160E-005	-	-	-	-	n.s.	n.s.	-	n.s.	n.s.	-	n.s.	n.s.
		LPS (10 pg/ml)	-	0.00015 ± 4.000E-005	9.500E-005 ± 2.380E-005	-	n.s.	n.s.	-	-	-	-	n.s.	n.s.	-	n.s.	n.s.
		LPS (100 ng/ml)	-	0.0001725 ± 4.646E-005	0.000104 ± 2.510E-005	-	n.s.	n.s.	-	n.s.	n.s.	-	-	-	-	n.s.	n.s.
		UHMWPE (1:500)	-	0.0001275 ± 3.500E-005	0.0001 ± 3.162E-005	-	n.s.	n.s.	-	n.s.	n.s.	-	n.s.	n.s.	-	-	-
	THP-1 / MG-63	negative control	-	0.0001325 ± 3.304E-005	0.0001225 ± 3.304E-005	-	-	-	-	n.s.	n.s.	-	n.s.	n.s.	-	n.s.	n.s.
		LPS (10 pg/ml)	-	0.000158 ± 5.263E-005	0.000125 ± 3.000E-005	-	n.s.	n.s.	-	-	-	-	n.s.	n.s.	-	n.s.	n.s.
		LPS (100 ng/ml)	-	0.0001367 ± 2.082E-005	0.000145 ± 4.041E-005	-	n.s.	n.s.	-	n.s.	n.s.	-	-	-	-	n.s.	n.s.
		UHMWPE (1:500)	-	0.000165 ± 3.512E-005	0.000146 ± 4.980E-005	-	n.s.	n.s.	-	n.s.	n.s.	-	n.s.	n.s.	-	-	-
rel. ALP mRNA expression [%]	MG-63 control	negative control	20.34 ± 3.904	16.55 ± 2.545	-	-	-	-	n.s.	n.s.	-	n.s.	n.s.	-	n.s.	n.s.	-
		LPS (10 pg/ml)	16.85 ± 2.353	15.72 ± 2.705	-	n.s.	n.s.	-	-	-	-	n.s.	n.s.	-	n.s.	n.s.	-
		LPS (100 ng/ml)	15.36 ± 3.032	11.61 ± 1.715	-	n.s.	n.s.	-	n.s.	n.s.	-	-	-	-	n.s.	n.s.	-
		UHMWPE (1:500)	19.02 ± 2.825	14.71 ± 3.466	-	n.s.	n.s.	-	n.s.	n.s.	-	n.s.	n.s.	-	-	-	-
	THP-1 / MG-63	negative control	14.01 ± 2.745	18.70 ± 2.190	-	-	-	-	n.s.	n.s.	-	n.s.	n.s.	-	n.s.	n.s.	-
		LPS (10 pg/ml)	14.01 ± 2.079	19.04 ± 2.132	-	n.s.	n.s.	-	-	-	-	n.s.	n.s.	-	n.s.	n.s.	-
		LPS (100 ng/ml)	14.72 ± 2.073	20.58 ± 1.527	-	n.s.	n.s.	-	n.s.	n.s.	-	-	-	-	n.s.	n.s.	-
		UHMWPE (1:500)	14.26 ± 2.519	19.77 ± 2.717	-	n.s.	n.s.	-	n.s.	n.s.	-	n.s.	n.s.	-	-	-	-
RANKL secretion [pg/ml] per 10 µg protein	MG-63 control	negative control	b.d.	b.d.	b.d.	-	-	-	n.a.	n.a.	n.a.	n.a.	n.a.	n.a.	n.a.	n.a.	n.a.
		LPS (10 pg/ml)	b.d.	b.d.	b.d.	n.a.	n.a.	n.a.	-	-	-	n.a.	n.a.	n.a.	n.a.	n.a.	n.a.
		LPS (100 ng/ml)	b.d.	b.d.	b.d.	n.a.	n.a.	n.a.	n.a.	n.a.	n.a.	-	-	-	n.a.	n.a.	n.a.
		UHMWPE (1:500)	b.d.	b.d.	b.d.	n.a.	n.a.	n.a.	n.a.	n.a.	n.a.	n.a.	n.a.	n.a.	-	-	-
	THP-1 / MG-63	negative control	b.d.	b.d.	b.d.	-	-	-	n.a.	n.a.	n.a.	n.a.	n.a.	n.a.	n.a.	n.a.	n.a.
		LPS (10 pg/ml)	b.d.	b.d.	b.d.	n.a.	n.a.	n.a.	-	-	-	n.a.	n.a.	n.a.	n.a.	n.a.	n.a.
		LPS (100 ng/ml)	b.d.	b.d.	b.d.	n.a.	n.a.	n.a.	n.a.	n.a.	n.a.	-	-	-	n.a.	n.a.	n.a.
		UHMWPE (1:500)	b.d.	b.d.	b.d.	n.a.	n.a.	n.a.	n.a.	n.a.	n.a.	n.a.	n.a.	n.a.	-	-	-
rel. RANKL mRNA expression [%]	MG-63 control	negative control	CT values comparable to negative controls			-	-	-	n.a.	n.a.	n.a.	n.a.	n.a.	n.a.	n.a.	n.a.	n.a.
		LPS (10 pg/ml)	CT values comparable to negative controls			n.a.	n.a.	n.a.	-	-	-	n.a.	n.a.	n.a.	n.a.	n.a.	n.a.
		LPS (100 ng/ml)	CT values comparable to negative controls			n.a.	n.a.	n.a.	n.a.	n.a.	n.a.	-	-	-	n.a.	n.a.	n.a.
		UHMWPE (1:500)	CT values comparable to negative controls			n.a.	n.a.	n.a.	n.a.	n.a.	n.a.	n.a.	n.a.	n.a.	-	-	-
	THP-1 / MG-63	negative control	CT values comparable to negative controls			-	-	-	n.a.	n.a.	n.a.	n.a.	n.a.	n.a.	n.a.	n.a.	n.a.
		LPS (10 pg/ml)	CT values comparable to negative controls			n.a.	n.a.	n.a.	-	-	-	n.a.	n.a.	n.a.	n.a.	n.a.	n.a.
		LPS (100 ng/ml)	CT values comparable to negative controls			n.a.	n.a.	n.a.	n.a.	n.a.	n.a.	-	-	-	n.a.	n.a.	n.a.
		UHMWPE (1:500)	CT values comparable to negative controls			n.a.	n.a.	n.a.	n.a.	n.a.	n.a.	n.a.	n.a.	n.a.	-	-	-
